# Supplementary material for: A single-cell atlas of the human substantia nigra reveals cell-specific pathways associated with neurological disorders
Source: PubMed Central journal article supplement (PMC7442652; doi:10.1038/s41467-020-17876-0), 2020-08-21
Supplement: 41467_2020_17876_MOESM3_ESM.pdf [file 41467_2020_17876_MOESM3_ESM.pdf]

## Description of Additional Supplementary Files

File Name: Supplementary Data 1

Description: 10x genomics single nuclei RNA sequencing quality control metrics for samples

File Name: Supplementary Data 2

Description: Cortex-substantia nigra cell-type annotations

File Name: Supplementary Data 3

Description: Differentially expressed genes for cell-types and cell-type subpopulation clusters in the substantia nigra (SN) and cortex single nuclei RNAseq

File Name: Supplementary Data 4

Description: Cell-type specific gene sets generated using t-statistics for cortex and SN cell atlas

File Name: Supplementary Data 5

Description: Cell-type specific gene sets generated using t-statistics for cortex and SN cell atlas without the amyloidosis sample

File Name: Supplementary Data 6

Description: Top 100 GO enriched pathways for cell-type specific modules in substantia nigra

File Name: Supplementary Data 7

Description: Top 100 GO enriched pathways for cell-type specific modules in cortex
